# Supplementary material
Source: PubMed Central journal article supplement (PMC4724279)
Supplement: NIHMS728277-supplement-Supp_TableS1-S4___FigureS1-S2.pdf [file NIHMS728277-supplement-Supp_TableS1-S4___FigureS1-S2.pdf]

Supplemental Table 1: Wound Bed<sup>1</sup>

| Protein name                  | Sequence coverage | Peptide sequence    | Calculated peptide mass (Da) |
|-------------------------------|-------------------|---------------------|------------------------------|
| Collagen alpha-1(XII) chain   | 1.93%             | DLSADTEYQISVSAMK    | 1,758                        |
|                               |                   | ITVIAVYEDGDGGHLTGNR | 2,044                        |
|                               |                   | NSDVEIFAVGVK        | 1,278                        |
|                               |                   | TEFNLNQYYQR         | 1,476                        |
| Collagen alpha-1(VI) chain    | 3.02%             | DAEEAISQTIDTIVDMI   | 1,864                        |
|                               |                   | DAEEAISQTIDTIVDMIK  | 1,992                        |
|                               |                   | GLEQLLVGGSHLK       | 1,351                        |
| Annexin A1<br>OS=Homo sapiens | 11.60%            | GVDEATIIDILTK       | 1,388                        |
|                               |                   | SEDFGVNEDLADSDAR    | 1,740                        |
|                               |                   | TPAQFDADELK         | 1,263                        |
| Hemoglobin subunit beta       | 44.20%            | EFTPPVQAAYQK        | 1,379                        |
|                               |                   | FFESFGDLSTPDAVMGNPK | 2,075                        |
|                               |                   | SAVTALWGK           | 933                          |
|                               |                   | VNVDEVGGEALGR       | 1,315                        |

|                                                               |        |                                      |       |
|---------------------------------------------------------------|--------|--------------------------------------|-------|
|                                                               |        | VVAGVANALAHK                         | 1,150 |
| Serotransferrin                                               | 4.58%  | DGAGDVAFVK                           | 978   |
|                                                               |        | HSTIFENLANK                          | 1,274 |
|                                                               |        | SASDLTWDNLK                          | 1,250 |
| Myristoylated<br>alanine-rich C-<br>kinase substrate          | 24.70% | EAPAEGEAAEPGSPTAAEGEAASAASSTS<br>SPK | 2,915 |
|                                                               |        | EELQANGSAPAADKEEPAAAGSGAASPS<br>AAEK | 2,982 |
|                                                               |        | GEPAAAAAPEAGASPVEK                   | 1,623 |
| Annexin A6                                                    | 6.54%  | DLEADIIGDTSGHFQK                     | 1,746 |
|                                                               |        | GLGTDEDTIIDIITHR                     | 1,769 |
|                                                               |        | PANDFNPDADAK                         | 1,275 |
| Neuroblast<br>differentiation-<br>associated<br>protein AHNAK | 0.70%  | GEGPDVDVNLPK                         | 1,240 |
|                                                               |        | IEGEMQVPDVIDR                        | 1,501 |
|                                                               |        | VDIEGPDVNIIEGPEGK                    | 1,668 |
| Actin,<br>cytoplasmic 1                                       | 42.70% | ALDFEQEMATAASSSSLEK                  | 2,015 |
|                                                               |        | DLTDYLMK                             | 998   |
|                                                               |        | DLYANTVLSGGTTMYPGIADR                | 2,231 |

|               |        |                        |       |
|---------------|--------|------------------------|-------|
|               |        | DSYVGDEAQSK            | 1,199 |
|               |        | EITALAPSTMK            | 1,178 |
|               |        | GYSFTTTAER             | 1,133 |
|               |        | HQGVMVGMGQK            | 1,172 |
|               |        | NTVLSGGTTMYPGIADR      | 1,753 |
|               |        | QEYDESGPSIVHR          | 1,517 |
|               |        | SYELPDGQVITIGNER       | 1,791 |
|               |        | TTGIVMDSGDGVTHTVPIYEGY | 2,312 |
|               |        | VAPEEHPVLLTEAPLNPK     | 1,954 |
|               |        | VLSGGTTMYPGIADR        | 1,538 |
| Serum albumin | 20.90% | AEFAEVSK               | 880   |
|               |        | AVMDDFAAFVEK           | 1,343 |
|               |        | DLGEENFK               | 951   |
|               |        | DVFLGMFLYEYAR          | 1,624 |
|               |        | FKDLGEENFK             | 1,227 |
|               |        | FQNALLVR               | 961   |
|               |        | FYAPELLFFAK            | 1,346 |
|               |        | HPYFYAPELLFFAK         | 1,743 |
|               |        | MDDFAAFVEK             | 1,173 |
|               |        | QTALVELVK              | 1,001 |
|               |        | RHPDYSVLLLR            | 1,468 |
|               |        | SLHTLFGDK              | 1,018 |
|               |        | TYETTLEK               | 984   |

|                               |        |                                       |       |
|-------------------------------|--------|---------------------------------------|-------|
|                               |        | VFDEFKPLVEEPQNLI                      | 1,917 |
|                               |        | VFDEFKPLVEEPQNLIK                     | 2,045 |
|                               |        | YLYEIAR                               | 927   |
| Collagen alpha-<br>1(I) chain | 33.10% | DGEAGAQQPPGPAGPAGER                   | 1,691 |
|                               |        | DGLNGLPGPIGPPGPR                      | 1,562 |
|                               |        | EGAPGAEGSPGR                          | 1,116 |
|                               |        | GANGAPGIAGAPGFPGAR                    | 1,586 |
|                               |        | GDAGPAGPKGEPGSPGENGAPGQMGPR           | 2,525 |
|                               |        | GDAGPPGPAGPAGPPGPIGNVGAPGAK           | 2,281 |
|                               |        | GDRGETGPAGPPGAPGAPGAPGPVGPAG<br>K     | 2,513 |
|                               |        | GEPGPPGPAGFAGPPGADGQPGAK              | 2,134 |
|                               |        | GEPGPVGVQPPGPAGEEGK                   | 1,848 |
|                               |        | GEPGSPGENGAPGQMGPR                    | 1,743 |
|                               |        | GESGPSGPAGPTGAR                       | 1,298 |
|                               |        | GETGPAGPPGAPGAPGAPGPVGPAGK            | 2,169 |
|                               |        | GETGPAGRPGEVGPPGPPGPAGEK              | 2,216 |
|                               |        | GFSGLQGPPGPPGSPGEQGPSGASGPAGP<br>R    | 2,705 |
|                               |        | GLTGPIGPPGPAGAPGDK                    | 1,591 |
|                               |        | GLTGPIGPPGPAGAPGDKGESGPSGPAGP<br>TGAR | 2,869 |

|                           |        |                                    |       |
|---------------------------|--------|------------------------------------|-------|
|                           |        | GNDGATGAAGPPGPTGPAGPPGFPGAVG<br>AK | 2,548 |
|                           |        | GPAGPQGPR                          | 836   |
|                           |        | GPPGPMGPPGLAGPPGESGR               | 1,833 |
|                           |        | GPPGSAGAPGK                        | 911   |
|                           |        | GPSGPQGGPPGPK                      | 1,319 |
|                           |        | GQAGVMGFPGPK                       | 1,194 |
|                           |        | GSAGPPGATGFPGAAGR                  | 1,460 |
|                           |        | GSPGADGPAGAPGTPGPQGIAGQR           | 2,105 |
|                           |        | GSPGEAGRPGEAGLPGAK                 | 1,656 |
|                           |        | GVVGLPGQR                          | 899   |
|                           |        | PGEAGLPGAK                         | 928   |
|                           |        | PGEQGVPGDLGAPGSGAR                 | 1,767 |
|                           |        | VGPPGPSGNAGPPGPPGPAGK              | 1,813 |
| Ceruloplasmin             | 4.88%  | EFYLFPTVFDENESLLEDNIR              | 2,703 |
|                           |        | TTIEKPVWLGLGFLGPIIK                | 1,912 |
|                           |        | VNKDDEEFIESNK                      | 1,567 |
| Alpha-enolase             | 12.40% | DYPVVSIEDPFDQDDWGAWQK              | 2,510 |
|                           |        | FTASAGIQVVGDDLTVTNP                | 2,033 |
|                           |        | GNPTVEVDLFTSK                      | 1,407 |
| Alpha-2-<br>macroglobulin | 5.63%  | AEVGVTVPDTITIEWK                   | 1,645 |
|                           |        | LHTEAQIQEEGTVELTGR                 | 2,110 |

|                              |        |                                |       |
|------------------------------|--------|--------------------------------|-------|
|                              |        | LPPNVVEESAR                    | 1,211 |
|                              |        | NEDSLVQVQTDK                   | 1,395 |
|                              |        | SSGSLLNNAIK                    | 1,104 |
|                              |        | SSSNEEVMFLTVQVK                | 1,698 |
| Caldesmon                    | 7.19%  | QEEESLGQVTDQVEVNAQNSVPDEEAK    | 2,972 |
|                              |        | TTTTNTQVEGDDEAAFLER            | 2,098 |
|                              |        | YEIEETETVTK                    | 1,342 |
| Tenascin                     | 2.04%  | ESNPATINAATELDTPK              | 1,772 |
|                              |        | SQTVSAIATTAMGSPK               | 1,550 |
|                              |        | TPVLSAEASTAK                   | 1,175 |
| 14-3-3 protein<br>zeta/delta | 24.90% | DSTLIMQLLR                     | 1,190 |
|                              |        | GIVDQSQQAYQEAFEISK             | 2,041 |
|                              |        | SVTEQGAELSNEER                 | 1,549 |
|                              |        | TAFDEAIAELDTLSEESYK            | 2,132 |
| Prelamin-A/C                 | 6.02%  | NSNLVGAAHEELQQR                | 1,753 |
|                              |        | SGAQASSTPLSPTR                 | 1,360 |
|                              |        | SLETENAGLR                     | 1,090 |
| Filamin-A                    | 3.14%  | DAGEGGLSLAIEGPSK               | 1,501 |
|                              |        | EAGAGGLAIAVEGPSK               | 1,427 |
|                              |        | SAGQGEVLVYVEDPAGHQEEAK         | 2,313 |
|                              |        | VGSAADIPINISSETDLSLLTATVVPPSGR | 2,894 |
| Annexin A2                   | 20.10% | AEDGSVIDYELIDQDAR              | 1,909 |

|                         |        |                                                  |       |
|-------------------------|--------|--------------------------------------------------|-------|
|                         |        | DIISDTSGDFR                                      | 1,226 |
|                         |        | GVDEVTIVNILTNR                                   | 1,543 |
|                         |        | SALSGHLETVILGLLK                                 | 1,651 |
|                         |        | TNQELQEINR                                       | 1,245 |
| Fibrinogen alpha chain  | 26.90% | ESSSHHPGIAEFPSR                                  | 1,638 |
|                         |        | GGSTSYGTGSETESPR                                 | 1,573 |
|                         |        | GLIDEVNQDFTNR                                    | 1,521 |
|                         |        | GSAGHWTSSESSVSGSTGQWHSESGFRP<br>DSPGSGNAR        | 3,734 |
|                         |        | HPDEAAFFDTASTGK                                  | 1,594 |
|                         |        | LEVDIDIK                                         | 945   |
|                         |        | MADEAGSEADHEGTHSTK                               | 1,873 |
|                         |        | NPGSSGTGGTATWKPGSSGPGSTGSWNS<br>GSSGTGSTGNQNPSPR | 4,121 |
|                         |        | NPSSAGSWNSGSSGPGSTGNR                            | 1,964 |
|                         |        | PGSTGTWNPSSER                                    | 1,433 |
|                         |        | PNNPDWGTFFEEVSGNVSPGTR                           | 2,260 |
|                         |        | VTSGSTTTTR                                       | 1,011 |
| Ig kappa chain C region | 35.80% | DSTYLSSTLTLK                                     | 1,503 |
|                         |        | VDNALQSGNSQESVTEQDSK                             | 2,136 |
|                         |        | VQWKVDNALQSGNSQESVTEQDSK                         | 2,677 |

|                                       |        |                               |       |
|---------------------------------------|--------|-------------------------------|-------|
| Triosephosphate isomerase             | 19.90% | ELASQPVDVGFLVGGASLKPEFVDIINAK | 3,030 |
|                                       |        | SNVSDAVAQSTR                  | 1,235 |
|                                       |        | VTNGAFTGEISPGMIK              | 1,622 |
| Actin, aortic smooth muscle           | 33.40% | ALDFENEMATAASSSSLEK           | 2,001 |
|                                       |        | DLTDYLMK                      | 998   |
|                                       |        | DLYANNVLSGGTTMYPGIADR         | 2,228 |
|                                       |        | DSYVGDEAQSK                   | 1,199 |
|                                       |        | EITALAPSTMK                   | 1,178 |
|                                       |        | HQGVMMVGMGQK                  | 1,172 |
|                                       |        | QEYDEAGPSIVHR                 | 1,484 |
|                                       |        | SYELPDGQVITIGNER              | 1,791 |
|                                       |        | VLSGGTTMYPGIADR               | 1,538 |
|                                       |        | YPIEHGIITNWDDMEK              | 1,961 |
| Peptidyl-prolyl cis-trans isomerase B | 21.30% | DFMIQGGDFTR                   | 1,287 |
|                                       |        | DTNGSQFFITTVK                 | 1,458 |
|                                       |        | TVDNFVALATGEK                 | 1,365 |
|                                       |        | VLEGMEVVR                     | 1,032 |
| Fibulin 1                             | 8.74%  | IIEVEEEQEDPYLNDR              | 1,991 |
|                                       |        | SQETGDLDVGGGLQETDK            | 1,792 |



|                                        |        |                                    |       |
|----------------------------------------|--------|------------------------------------|-------|
|                                        |        | VSPHSGVVALTKPVPEPRDLLLTVKMDL<br>SR | 3,271 |
| Serpin H1                              | 16.50% | DEEVHAGLGELLR                      | 1,438 |
|                                        |        | DQAVENILVSPVVVASSLGLVSLGGK         | 2,551 |
|                                        |        | HLAGLGLTEAIDK                      | 1,338 |
|                                        |        | SALQSINEWAAQTDDGK                  | 1,820 |
| Alpha-1-<br>antichymotrypsi<br>n       | 12.80% | AVLDVFEEGTEASAATAVK                | 1,908 |
|                                        |        | DLDSQTMMVLVNYIFFK                  | 2,064 |
|                                        |        | HPNSPLDEENLTQENQDR                 | 2,136 |
|                                        |        | NSPLDEENLTQENQDR                   | 1,902 |
| Histone H1.4                           | 10.50% | ALAAAGYDVEK                        | 1,108 |
|                                        |        | ASGPPVSELITK                       | 1,199 |
|                                        |        | GPPVSELITK                         | 1,041 |
| Heat shock<br>protein HSP 90-<br>alpha | 6.28%  | EDQTEYLEER                         | 1,312 |
|                                        |        | GVVDSIDLPLNISR                     | 1,514 |
|                                        |        | NPDDITNEEYGEFYK                    | 1,834 |
|                                        |        | TKPIWTRNPDDITNEEYGEFYK             | 2,748 |
| Fibronectin                            | 6.16%  | GLKPGVVYEGQLISIQQYGHQEVTR          | 2,799 |
|                                        |        | HTSVQTTSSGSGPF                     | 1,393 |

|                                      |        |                              |       |
|--------------------------------------|--------|------------------------------|-------|
|                                      |        | NLQPASEYTVSLVAIK             | 1,733 |
|                                      |        | SSPVVIDASTAIDAPSNLR          | 1,913 |
|                                      |        | TEIDKPSQMQVTDVQDNSISVK       | 2,462 |
|                                      |        | TETITGFQVDAVPANGQTPIQR       | 2,343 |
|                                      |        | VPGTSTSATLTGLTR              | 1,462 |
|                                      |        | VTDATETTITISWR               | 1,594 |
| Hemoglobin<br>subunit alpha          | 30.30% | TYFPHFDLSHGSAQVK             | 1,834 |
|                                      |        | VADALTNAVAHV                 | 1,181 |
|                                      |        | VGAHAGEYGAEALER              | 1,530 |
| TRYP_PIG<br>TRYPSIN<br>PRECURSOR     | 16.90% | LGEHNIDVLEGNEQFIN            | 1,941 |
|                                      |        | LSSPATLNSR                   | 1,046 |
|                                      |        | YVNWIIQQTIAAN                | 1,421 |
| Tubulin beta<br>chain                | 14.90% | EVDEQMLNVQNK                 | 1,463 |
|                                      |        | FWEVISDEHGIDPTGTYHGSDLQLDR   | 3,102 |
|                                      |        | GHYTEGAELVDSVLDVVR           | 1,959 |
|                                      |        | GHYTEGAELVDSVLDVVRKEAESCDCCL | 2,937 |
| 78 kDa glucose-<br>regulated protein | 10.40% | DAGTIAGLNVMR                 | 1,234 |
|                                      |        | ELEEIVQPIISK                 | 1,398 |

|                            |       |                              |       |
|----------------------------|-------|------------------------------|-------|
|                            |       | NQLTSNPENTVFDK               | 1,678 |
|                            |       | SQIFSTASDNQPTVTIK            | 1,837 |
|                            |       | TWNDPSVQQDIK                 | 1,431 |
| Collagen alpha-3(VI) chain | 7.77% | ALGSAIEYTIENVFESAPNPR        | 2,278 |
|                            |       | DEVQNAVQR                    | 1,059 |
|                            |       | DQNVFVAQK                    | 1,049 |
|                            |       | DVVFLIDGSQSAGPEFQYVR         | 2,227 |
|                            |       | GFMYDRPLRLNLLLDYELAEQLDNIAEK | 3,500 |
|                            |       | IEDGVLQFLVLLVAGR             | 1,742 |
|                            |       | IEDGVPQHLVVLGGK              | 1,674 |
|                            |       | IIDELNVKPEGTR                | 1,484 |
|                            |       | LNLLLDYELAEQLDNIAEK          | 2,332 |
|                            |       | NADPAELEQIVLSPAFILAAESLPK    | 2,636 |
|                            |       | NLLLDYELAEQLDNIAEK           | 2,219 |
|                            |       | NLQVALTSK                    | 974   |
|                            |       | NNLFTSSAGYR                  | 1,230 |
|                            |       | QLGTVQQVISER                 | 1,358 |
|                            |       | SLDEISQPAQELK                | 1,458 |
|                            |       | SVEDAQDVSLALTQR              | 1,632 |
|                            |       | TELQTITNDPR                  | 1,288 |
|                            |       | VVIHFTDGADGDLADLHR           | 1,951 |

|                                      |        |                       |       |
|--------------------------------------|--------|-----------------------|-------|
| Endoplasmin                          | 5.60%  | EEASDYLELDTIK         | 1,526 |
|                                      |        | EEEAIQLDGLNASQIR      | 1,786 |
|                                      |        | EESDDEAAVEEEEEEEK     | 1,867 |
| Transketolase                        | 9.47%  | ILATPPQEDAPSVDIANIR   | 2,020 |
|                                      |        | SVPTSTVFYPSDGVATEK    | 1,885 |
|                                      |        | TSRPENAIYNNNEDFQVGQAK | 2,508 |
| Pyruvate kinase<br>isozymes<br>M1/M2 | 17.50% | DPVQEAWAEDVDLR        | 1,643 |
|                                      |        | GADFLVTEVENGGSLGSK    | 1,780 |
|                                      |        | GSGTAEVELK            | 991   |
|                                      |        | GVNLPGAAVDLPVSEK      | 1,637 |
|                                      |        | LDIDSPITAR            | 1,198 |
|                                      |        | PVAVALDTK             | 914   |
|                                      |        | TATESFASDPILYR        | 1,571 |
| Vimentin                             | 39.70% | DGQVINETSQHDDLE       | 1,837 |
|                                      |        | DNLAEDIMR             | 1,077 |
|                                      |        | EEAENTLQSFR           | 1,324 |
|                                      |        | EMEENFAVEAANYQDTIGR   | 2,187 |
|                                      |        | ETNLDSLPLVDTH         | 1,454 |
|                                      |        | FADLSEAANR            | 1,094 |
|                                      |        | GTNESLER              | 905   |
|                                      |        | LHEEEIQELQAQIQEQH     | 2,102 |

|                           |        |                                        |       |
|---------------------------|--------|----------------------------------------|-------|
|                           |        | LHEEEIQELQAQIQEQHVQIDVDVSKPDL<br>TAAL  | 3,767 |
|                           |        | LHEEEIQELQAQIQEQHVQIDVDVSKPDL<br>TAALR | 3,923 |
|                           |        | LQEEMLQR                               | 1,047 |
|                           |        | MALDIEIATYR                            | 1,296 |
|                           |        | MEENFAVEAANYQDTIGR                     | 2,058 |
|                           |        | NLQEAEEWYK                             | 1,310 |
|                           |        | QDVDNASLAR                             | 1,089 |
|                           |        | TYSLGSALR                              | 968   |
|                           |        | VELQELNDR                              | 1,116 |
|                           |        | YQDLLNVK                               | 993   |
| Fibrinogen<br>gamma chain | 30.90% | AGGDAGDAFDGDFGDDPSDK                   | 2,076 |
|                           |        | AIQLTYNPDESSKPNMIDAATLK                | 2,536 |
|                           |        | DTVQIHDITGK                            | 1,227 |
|                           |        | EGFGHLSPTGTTEFWLGNEK                   | 2,207 |
|                           |        | GGDAGDAFDGDFGDDPSDK                    | 2,005 |
|                           |        | LDGSVDFK                               | 880   |
|                           |        | NGYDNGIHWATWK                          | 1,538 |
|                           |        | TSTADYAMFK                             | 1,151 |
|                           |        | VELEDWNGR                              | 1,118 |
|                           |        | YEASILTHDSSIR                          | 1,492 |

|                         |        |                          |       |
|-------------------------|--------|--------------------------|-------|
|                         |        | YLQEIYNSNNQK             | 1,514 |
| Alpha-1-<br>antitrypsin | 23.40% | DTEEEDFHVDQVTTVK         | 1,892 |
|                         |        | LQHLENELTHDIITK          | 1,804 |
|                         |        | SVLGQLGITK               | 1,016 |
|                         |        | TDTSHHDQDHPTFNK          | 1,780 |
|                         |        | TLNQPDSQLQLTTGNGLFLSEGLK | 2,574 |
|                         |        | VFSNGADLSGVTEEAPLK       | 1,834 |
| Myosin-9                | 12.50% | ALEEAMEQK                | 1,048 |
|                         |        | ANLQIDQINTDLNLER         | 1,870 |
|                         |        | AQLEEQLDNETK             | 1,418 |
|                         |        | DFSALESQLQDTQELLQEENR    | 2,493 |
|                         |        | DLEAHIDSANK              | 1,213 |
|                         |        | EEVGEEAIVELVENGK         | 1,744 |
|                         |        | ELEDATETADAMNR           | 1,566 |
|                         |        | EQADFAIEALAK             | 1,306 |
|                         |        | HEAMITDLEER              | 1,344 |
|                         |        | HSQAVEELAEQLEQTK         | 1,840 |
|                         |        | IAQLEEELEEEQGNTTELINDR   | 2,472 |
|                         |        | IAQLEEQLDNETK            | 1,531 |
|                         |        | LEGDSTDLSQIAELQAQIAELK   | 2,487 |
|                         |        | NLPIYSEEIVEMYK           | 1,744 |
|                         |        | NTDQASMPDNNTAAQK         | 1,592 |

|                               |        |                                        |       |
|-------------------------------|--------|----------------------------------------|-------|
|                               |        | QLLQANPILEAFGNAK                       | 1,710 |
|                               |        | TELEDTLDSTAAQQELR                      | 1,920 |
| Collagen alpha-<br>2(I) chain | 27.20% | EGPVGLPGIDGR                           | 1,183 |
|                               |        | GAPGPDGNNGAQGPPGPQGVQGGK               | 2,146 |
|                               |        | GDGGPPGMTGFPGAAGR                      | 1,550 |
|                               |        | GEAGAAGPAGPAGPR                        | 1,236 |
|                               |        | GENGVVGPTGPVGAAGPAGPNGPPGPA<br>GSR     | 2,567 |
|                               |        | GEPGAPGENGTPGQTGAR                     | 1,701 |
|                               |        | GEPGNIGFPGPK                           | 1,202 |
|                               |        | GEPGSAGPQGPSPSGEEGK                    | 1,824 |
|                               |        | GEPGVVGAVGTAGPSGSPGLPGER               | 2,137 |
|                               |        | GETGPSGPVGPAGAVGPR                     | 1,563 |
|                               |        | GIPGPVGAAGATGAR                        | 1,268 |
|                               |        | GLPGVAGAVGEPGPLGIAGPPGAR               | 2,115 |
|                               |        | GPAGPSGPAGK                            | 895   |
|                               |        | GPKGGENGVVGPTGPVGAAGPAGPNGPP<br>GPAGSR | 2,865 |
|                               |        | GPNGEAGSAGPPGPPGLR                     | 1,620 |
|                               |        | GPPGAVGSPGVNGAPGEAGR                   | 1,752 |
|                               |        | GPPGESGAAGPTGPIGSR                     | 1,581 |
|                               |        | GPSGPPGPDGNK                           | 1,096 |

|                                |        |                                          |       |
|--------------------------------|--------|------------------------------------------|-------|
|                                |        | GPSGPPGPDGNKGEPGVVGAVGTAGPSG<br>PSGLPGER | 3,214 |
|                                |        | GPVGPAGAVGPR                             | 1,035 |
|                                |        | NSIAYMDEETGNLK                           | 1,585 |
|                                |        | PGPIGPAGAR                               | 893   |
|                                |        | TGEVGAVGPPGFAGEK                         | 1,489 |
|                                |        | TGPPGPSGISGPPGPPGAGK                     | 1,846 |
| Alpha-1-acid<br>glycoprotein 1 | 29.40% | NWGLSVYADKPETTK                          | 1,709 |
|                                |        | SDVVYTDWK                                | 1,113 |
|                                |        | TEDTIFLR                                 | 995   |
|                                |        | TYMLAFDVNDEK                             | 1,446 |
|                                |        | YVGGQEHFAHLLILR                          | 1,753 |
| Alpha-actinin-1                | 5.83%  | ALDFIASK                                 | 864   |
|                                |        | DYETATLSEIK                              | 1,270 |
|                                |        | MLDAEDIVGTARPDEK                         | 1,760 |
|                                |        | VLAVNQENEQLMEDYEK                        | 2,052 |
| Prothymosin<br>alpha           | 33.30% | AAEDDEDDVDTK                             | 1,438 |
|                                |        | EVVEEAENGR                               | 1,132 |
|                                |        | SDAAVDTSSEITTK                           | 1,467 |
| Complement C3                  | 10.70% | ENEGFTVTAEGK                             | 1,282 |
|                                |        | FVTVQATFGTQVVEK                          | 1,654 |



|                        |        |                         |       |
|------------------------|--------|-------------------------|-------|
|                        |        | GLEVTITAR               | 960   |
|                        |        | IPIEDGSGEVVLSR          | 1,471 |
|                        |        | QKPDGVFQEDAPVIHQEMIGGLR | 2,564 |
|                        |        | SEFPESWLWNVEDLK         | 1,879 |
|                        |        | SGSDEVQVGQQR            | 1,290 |
|                        |        | SNLDEDIIAEENIVSR        | 1,817 |
|                        |        | TGLQEVEVK               | 1,003 |
|                        |        | TIYTPGSTVLYR            | 1,371 |
|                        |        | VPVAVQGEDTVQSLTQGDGVAK  | 2,198 |
|                        |        | VQLSNDFDEYIMAIEQTIK     | 2,257 |
| Tubulin alpha-1B chain | 20.40% | AVFVDLEPTVIDEVR         | 1,702 |
|                        |        | DYEEVGVDSVEGEGEEEGEEY   | 2,349 |
|                        |        | EDAANNYAR               | 1,023 |
|                        |        | EIIDLVLDLDR             | 1,086 |
|                        |        | TIGGGDDSFNTFFSETGAGK    | 2,008 |
|                        |        | VGINYQPPTVVPGGDLAK      | 1,825 |
| Fibrinogen beta chain  | 34.60% | AHYGGFTVQNEANK          | 1,536 |
|                        |        | DNENVVNEYSSELEK         | 1,769 |
|                        |        | EDGGGWYR                | 1,240 |
|                        |        | EEAPSLRPAPPISGGGYR      | 1,951 |
|                        |        | GGETSEMYLIQPDSSVK       | 1,841 |

|                             |        |                            |       |
|-----------------------------|--------|----------------------------|-------|
|                             |        | GGETSEMYLIQPSSVVKPYR       | 2,257 |
|                             |        | HGTDDGVVWMNWK              | 1,545 |
|                             |        | HQLYIDETVNSNIPTNLR         | 2,127 |
|                             |        | MGPTELLIEMEDWK             | 1,708 |
|                             |        | NSVDELNNNVEAVSQTSSESFQY    | 2,519 |
|                             |        | QDGSVDFGR                  | 980   |
|                             |        | TMTIHNGMFFSTYDR            | 1,821 |
| Collagen alpha-2(VI) chain  | 5.40%  | DVTVTAIGIGDMFHEK           | 1,733 |
|                             |        | GPDGYPGGAGSPGER            | 1,478 |
|                             |        | QFVPQFISQLQNEFYLDQVALSWR   | 2,956 |
| Collagen alpha-1(III) chain | 26.40% | DGNPGSDGLPGR               | 1,174 |
|                             |        | DGPPGPAGNTGAPGSPGVSGPK     | 1,922 |
|                             |        | DGSPGEPGANGLPGAAGER        | 1,757 |
|                             |        | GAAGPPGPPGAAGTPGLQGMPGER   | 2,164 |
|                             |        | GEAGIPGVPGAK               | 1,085 |
|                             |        | GEGGAPGLPGIAGPR            | 1,338 |
|                             |        | GEGGPPGVAGPPGSGPAGPPGPQGVK | 2,299 |
|                             |        | GEMGPAGIPGAPGLMGAR         | 1,687 |
|                             |        | GENGLPGENGAPGPMGPR         | 1,739 |
|                             |        | GESGPAGPAGAPGPAGSR         | 1,509 |
|                             |        | GETGPPGPAGFPGAPGQNGEPGGK   | 2,197 |

|  |  |                         |       |
|--|--|-------------------------|-------|
|  |  | GEVGPAGSPGSNGAPGQR      | 1,627 |
|  |  | GGPGGPGPQGPPGK          | 1,208 |
|  |  | GPAGPNGIPGEK            | 1,110 |
|  |  | GPPGLAGAPGLR            | 1,095 |
|  |  | GPPGPAGANGAPGLR         | 1,321 |
|  |  | GPPGPQGLPGLAGTAGEPGR    | 1,834 |
|  |  | GPTGPIGPPGPAGQPGDK      | 1,632 |
|  |  | GPVGPSGPPGK             | 950   |
|  |  | GSPGAQGPPGAPGLGIAGITGAR | 2,104 |
|  |  | GSPGGPGAAGFPGAR         | 1,304 |
|  |  | NGETGPQGPPGPTGPGGDK     | 1,720 |

1 These data were generated from a single patient.

Supplemental Table 2: Adjacent Dermis<sup>1</sup>

| Protein name              | Sequence coverage | Peptide sequence                        | Calculated peptide mass (Da) |
|---------------------------|-------------------|-----------------------------------------|------------------------------|
| Gelsolin                  | 8.44%             | AGALNSNDAFVLK                           | 1,320                        |
|                           |                   | FVIEEVPGELMQEDLATDDVMLLDTWDQVFV<br>WVGK | 4,067                        |
|                           |                   | TPSAAYLWVG TGASEAEK                     | 1,838                        |
| Collagen alpha-1(I) chain | 39.50%            | DGEAGAQQPPG PAGPAGER                    | 1,691                        |
|                           |                   | DGLNGLPGPIGPPGPR                        | 1,546                        |
|                           |                   | EGAPGAEGSPGR                            | 1,116                        |
|                           |                   | GANGAPGIAGAPGFPGAR                      | 1,586                        |
|                           |                   | GDAGAPGAPGSQ GAPGLQGM PGER              | 2,199                        |
|                           |                   | GDAGPPGPAGPAGPPGPIGNV GAPGAK            | 2,281                        |
|                           |                   | GEAGPQGPR                               | 868                          |
|                           |                   | GEPGPPGPAGAAGPAGNPGADGQPGAK             | 2,300                        |
|                           |                   | GEPGPPGPAGFAGPPGADGQPGAK                | 2,134                        |
|                           |                   | GEPGPVGVQGGPPGAGEEGK                    | 1,832                        |
|                           |                   | GEPGSPGENGAPGQMGR                       | 1,743                        |
|                           |                   | GESGPSGPAGPTGAR                         | 1,298                        |
|                           |                   | GETGPAGPPGAPGAPGAPVGPAGK                | 2,137                        |
|                           |                   | GETGPAGRPGEVGPPGPPGAGEK                 | 2,216                        |

|            |        |                                       |       |
|------------|--------|---------------------------------------|-------|
|            |        | GFPGADGVAGPK                          | 1,089 |
|            |        | GFPGLPGPSGEPGK                        | 1,297 |
|            |        | GFSGLDGAK                             | 851   |
|            |        | GFSGLQGPPGPPGSPGEQGPSGASGPAGPR        | 2,657 |
|            |        | GLTGPIGPPGPAGAPGDK                    | 1,591 |
|            |        | GLTGPIGPPGPAGAPGDKGESGPSGPAGPTGA<br>R | 2,869 |
|            |        | GLTGSPGSPGPDGK                        | 1,243 |
|            |        | GNDGATGAAGPPGPTGPAGPPGFPGA<br>VAK     | 2,516 |
|            |        | GPAGPQGPR                             | 836   |
|            |        | GPPGPMGPPGLAGPPGESGR                  | 1,817 |
|            |        | GPPGSAGAPGK                           | 911   |
|            |        | GPSGPQGPGGPPGPK                       | 1,303 |
|            |        | GQAGVMGFPGPK                          | 1,146 |
|            |        | GSAGPPGATGFPGAAGR                     | 1,460 |
|            |        | GSEGPQGVR                             | 886   |
|            |        | GSPGADGPAGAPGTPGPQGIAGQR              | 2,073 |
|            |        | GSPGEAGRPGEAGLPGAK                    | 1,656 |
|            |        | GVQGPPGPAGPR                          | 1,106 |
|            |        | GVVGLPGQR                             | 899   |
|            |        | PGEAGLPGAK                            | 928   |
|            |        | STGGISVPGPMGPSGR                      | 1,554 |
| Hemoglobin | 21.80% | AGEYGAEALER                           | 1,166 |

|                         |        |                          |       |
|-------------------------|--------|--------------------------|-------|
| subunit alpha           |        |                          |       |
|                         |        | TYFPHFDLSHGSAQVK         | 1,834 |
|                         |        | VGAHAGEYGAEALER          | 1,530 |
| Annexin A2              | 12.70% | AEDGSVIDYELIDQDAR        | 1,909 |
|                         |        | DALNIETAIK               | 1,088 |
|                         |        | SALSGHLETVILGLLK         | 1,651 |
| Alpha-1-<br>antitrypsin | 25.10% | DTEEEDFHVDQVTTVK         | 1,892 |
|                         |        | ELDRDTVFALVNYIFFK        | 2,090 |
|                         |        | LQHLENELTHDIITK          | 1,804 |
|                         |        | TDTSHHDQDHPTFNK          | 1,780 |
|                         |        | TLNQPDSQLQLTTGN          | 1,630 |
|                         |        | TLNQPDSQLQLTTGNGLFLSEGLK | 2,574 |
|                         |        | VFSNGADLSGVTEEAPLK       | 1,834 |
| Cofilin-1               | 29.50% | EILVGDVGGQTVDDPYATFVK    | 2,166 |
|                         |        | KEDLVFIFWAPESAPLK        | 1,990 |
|                         |        | LGGSAVISLEGK             | 1,131 |
| Apolipoprotein<br>A-I   | 14.60% | EQLGPVTQEFWDNLEK         | 1,933 |
|                         |        | QGLLPVLESFK              | 1,231 |
|                         |        | VSFLSALEEYTK             | 1,387 |
| Myosin-9                | 7.30%  | ANLQIDQINTDLNLER         | 1,870 |
|                         |        | EQADFAIEALAK             | 1,306 |

|                                                                  |        |                          |       |
|------------------------------------------------------------------|--------|--------------------------|-------|
|                                                                  |        | IAEFTTNLTETEEEK          | 1,654 |
|                                                                  |        | IAQLEEELEEEQGNTELINDR    | 2,472 |
|                                                                  |        | IAQLEEQLDNETK            | 1,531 |
|                                                                  |        | LQVELDNVTGLLSQSDDSK      | 1,946 |
|                                                                  |        | LTEMETLQSQLMAEK          | 1,752 |
|                                                                  |        | TELEDTLDDSTAAQQELR       | 1,920 |
|                                                                  |        | TQLEEELEDELQATEDAK       | 1,962 |
| Alpha-1-<br>antichymotryps<br>in                                 | 11.10% | ADLSGITGAR               | 961   |
|                                                                  |        | AVLDVFEEGTEASAATAVK      | 1,908 |
|                                                                  |        | LYGSEAFATDFQDSAAAK       | 1,892 |
| Neuroblast<br>differentiation-<br>associated<br>protein<br>AHNAK | 2.65%  | AEGPDVAVDLPK             | 1,211 |
|                                                                  |        | GEGPDVDVNLPK             | 1,240 |
|                                                                  |        | GEGPDVDVTLPK             | 1,227 |
|                                                                  |        | GGADVSGGVSAPDISLGEGHLSVK | 2,209 |
|                                                                  |        | GGVQVPAVDISSLGGR         | 1,599 |
|                                                                  |        | GPQITGPSLEGDLGLK         | 1,582 |
|                                                                  |        | ISMPDIDLNLTGPK           | 1,514 |

|                                      |        |                      |       |
|--------------------------------------|--------|----------------------|-------|
|                                      |        | MDVNVGDIDIEGPEGK     | 1,688 |
|                                      |        | QGFDLNVPGGEIDASLK    | 1,760 |
|                                      |        | VDIEGPDVNIEGPEGK     | 1,668 |
| Pyruvate kinase<br>isozymes<br>M1/M2 | 16.20% | DPVQEAWAEDVDLR       | 1,643 |
|                                      |        | FDEILEASDGIMVAR      | 1,666 |
|                                      |        | GADFLVTEVENGGSLGSK   | 1,780 |
|                                      |        | GVNLPGAAVDLPAVSEK    | 1,637 |
|                                      |        | IYVDDGLISLQVK        | 1,463 |
|                                      |        | PVAVALDTK            | 914   |
| TRYP_PIG<br>TRYPSIN<br>PRECURSOR     | 25.50% | GNTLDNDIMLIK         | 1,347 |
|                                      |        | IITHPNFNGNTLDNDIMLIK | 2,299 |
|                                      |        | LGEHNIDVLEGNEQ       | 1,567 |
|                                      |        | LGEHNIDVLEGNEQFIN    | 1,941 |
|                                      |        | LGEHNIDVLEGNEQFINAAK | 2,211 |
|                                      |        | VATVSLPR             | 843   |
|                                      |        | VNWIQQTIAAN          | 1,258 |
| Ig lambda-2<br>chain C regions       | 41.50% | AAPSVTLFPPSSEELQANK  | 1,986 |
|                                      |        | AGVETTPSK            | 991   |



|                             |        |                              |       |
|-----------------------------|--------|------------------------------|-------|
|                             |        | YAASSYLSLTPEQWK              | 1,744 |
| Actin, aortic smooth muscle | 38.20% | DFENEMATAASSSSLEK            | 1,817 |
|                             |        | DIKEKLCYVALDFENEMATAASSSSLEK | 3,150 |
|                             |        | DLTDYLMK                     | 1,014 |
|                             |        | DLYANNVLSGGTTMYPGIADR        | 2,228 |
|                             |        | DSYVGDEAQSK                  | 1,199 |
|                             |        | EITALAPSTMK                  | 1,162 |
|                             |        | SYELPDGQVITIGNER             | 1,791 |
|                             |        | TTGIVLDSGDGVTHNVPIYEGYALPH   | 2,725 |
|                             |        | YSVWIGGSILASLSTFQQMWISK      | 2,602 |
| Fibrinogen gamma chain      | 11.70% | EGFGHLSPTGTTEFWLGNEK         | 2,207 |
|                             |        | LDGSVDFK                     | 880   |
|                             |        | YEASILTHDSSIR                | 1,492 |
|                             |        | YLQEIYNSNNQK                 | 1,514 |
| Tubulin alpha-1B chain      | 9.31%  | AVFVDLEPTVIDEVR              | 1,702 |
|                             |        | EIIDLVLDR                    | 1,086 |
|                             |        | VGINYQPPTVVPGGDLAK           | 1,825 |
| Decorin                     | 16.40% | DLPPDTLLDLQNNK               | 1,697 |
|                             |        | NLHALILVNNK                  | 1,249 |
|                             |        | SSGIENGAFQGMK                | 1,326 |

|                                           |        |                        |       |
|-------------------------------------------|--------|------------------------|-------|
|                                           |        | VTFNGLNQMIVIELGTNPLK   | 2,201 |
| ATP synthase subunit alpha, mitochondrial | 7.23%  | ILGADTSVDLEETGR        | 1,576 |
|                                           |        | TGTAEMSSILEER          | 1,424 |
|                                           |        | TSIAIDTIINQK           | 1,317 |
| Collagen alpha-1(VI) chain                | 14.30% | DAEEAISQTIDTIVDMIK     | 1,992 |
|                                           |        | GLEQLLVGGSHLK          | 1,351 |
|                                           |        | IALVITDGR              | 958   |
|                                           |        | LLLFSDGNSQGATPAAIEK    | 1,932 |
|                                           |        | SDEVEIIQGLTR           | 1,360 |
|                                           |        | SESIGLQNFEIAK          | 1,436 |
|                                           |        | SLQWMAGGTFTGEALQYTR    | 2,117 |
|                                           |        | TAEYDVAYGESHLFR        | 1,758 |
|                                           |        | VFSVAITPDHLEPR         | 1,581 |
|                                           |        | YLIVVTDGHPLEGYK        | 1,704 |
| Ig gamma-1 chain C region                 | 13.60% | DTLMISR                | 835   |
|                                           |        | GFYPSDIAVEWESNGQPENNYK | 2,544 |
|                                           |        | VVSVLTVLHQDWLNGK       | 1,808 |
| Fibrinogen beta chain                     | 19.30% | DNDGWLTSDPR            | 1,276 |

|                                 |        |                                       |       |
|---------------------------------|--------|---------------------------------------|-------|
|                                 |        | DNENVVNEYSSELEK                       | 1,769 |
|                                 |        | GGETSEMYLIQPDSSVK                     | 1,841 |
|                                 |        | GGETSEMYLIQPDSSVKPYR                  | 2,257 |
|                                 |        | HGTDDGVVWMNWK                         | 1,545 |
|                                 |        | MGPTELLIEMEDWK                        | 1,692 |
|                                 |        | NSVDELNNNVEAVSQTSSSSFQ                | 2,356 |
| Annexin A1                      | 14.70% | DITSDTSGDFR                           | 1,214 |
|                                 |        | GGPGSAVSPYPTFNPSSDVAALHK              | 2,356 |
|                                 |        | SEDFGVNEDLADSDAR                      | 1,740 |
| Collagen alpha-1(XIV) chain     | 2.39%  | IGILITDGK                             | 930   |
|                                 |        | LQEIEGPSVSIMEK                        | 1,560 |
|                                 |        | VTVTPIYTDGEGVSVSAPGK                  | 1,977 |
| Heat shock protein HSP 90-alpha | 8.20%  | LGLGIDEDDPTADDTSAAVTEEMPPLGDDDT<br>SR | 3,548 |
|                                 |        | SLTNDWEDHLAVK                         | 1,528 |
|                                 |        | TLTIVDTGIGMTK                         | 1,350 |
| Serotransferrin                 | 8.60%  | DGAGDVAFVK                            | 978   |
|                                 |        | DSGFQMNQLR                            | 1,196 |
|                                 |        | EDLIWELLNQAQEHFGK                     | 2,070 |
|                                 |        | HSTIFENLANK                           | 1,274 |
|                                 |        | MYLGYEYVTAIR                          | 1,479 |

|                            |        |                              |       |
|----------------------------|--------|------------------------------|-------|
| Mimecan                    | 17.80% | DFADIPNLR                    | 1,061 |
|                            |        | LDFTGNLIEDIEDGTFSK           | 2,014 |
|                            |        | LEGNPIVLGK                   | 1,040 |
|                            |        | LSLLEELSLAENQLLK             | 1,813 |
| Histone H1.4               | 9.59%  | ASGPPVSELITK                 | 1,199 |
|                            |        | SGPPVSELITK                  | 1,128 |
|                            |        | SGVSLAALK                    | 846   |
| Fibronectin                | 1.97%  | DLQFVEVTDVK                  | 1,293 |
|                            |        | SYTITGLQPGTDYK               | 1,544 |
|                            |        | TEIDKPSQMQVTDVQDNSISVK       | 2,462 |
| Haptoglobin                | 6.40%  | TEGDGVYTLNDK                 | 1,312 |
|                            |        | TEGDGVYTLNDKK                | 1,440 |
|                            |        | TEGDGVYTLNNEK                | 1,440 |
| Collagen alpha-3(VI) chain | 11.20% | ALILVGLER                    | 984   |
|                            |        | DEVQNAVQR                    | 1,059 |
|                            |        | DSFQEVLR                     | 994   |
|                            |        | GAQGPAGPAGPPGLIGEQGISGPR     | 2,157 |
|                            |        | GFMYDRPLRLNLLLDYELAEQLDNIAEK | 3,500 |
|                            |        | HIVLKPPTIVTQVIEVNK           | 2,028 |
|                            |        | IEDGVLQFLVLLVAGR             | 1,742 |
|                            |        | IEDGVPQHLVVLGGK              | 1,674 |
|                            |        | IGDLHPQIVNLLK                | 1,460 |

|                               |        |                           |       |
|-------------------------------|--------|---------------------------|-------|
|                               |        | IIDELNVKPEGTR             | 1,484 |
|                               |        | ITEGVPQLLIVLTADR          | 1,738 |
|                               |        | LLVLITGGK                 | 914   |
|                               |        | LNLDDL DYELAEQLDNIAEK     | 2,332 |
|                               |        | LQPVLQPLSPGVGGK           | 1,587 |
|                               |        | LVDYLDVGFDTTR             | 1,514 |
|                               |        | NADPAELEQIVLSPAFILAAESLPK | 2,636 |
|                               |        | NLQVALTSK                 | 974   |
|                               |        | NNLFTSSAGYR               | 1,230 |
|                               |        | QLGTVQQVISER              | 1,358 |
|                               |        | QQSLETAMSFVAR             | 1,468 |
|                               |        | SDDEVDDPAVELK             | 1,432 |
|                               |        | SSGIVSLGVGDR              | 1,147 |
|                               |        | SVEDAQDVSLALTQR           | 1,632 |
|                               |        | TELQTITNDPR               | 1,288 |
|                               |        | VAVVTYNNEVTTEIR           | 1,708 |
|                               |        | VVESLDVGQDR               | 1,217 |
| Collagen alpha-<br>2(I) chain | 40.00% | EGPVGLPGIDGR              | 1,183 |
|                               |        | GAAGLPGVAGAPGLPGPR        | 1,563 |
|                               |        | GAPGPDGNNGAQGGPPGQGVQGGK  | 2,146 |
|                               |        | GDGGPPGMTGFPGAAGR         | 1,534 |
|                               |        | GEAGAAGPAGPAGPR           | 1,236 |

|  |                                          |       |
|--|------------------------------------------|-------|
|  | GEIGAVGNAGPAGPAGPR                       | 1,548 |
|  | GENGVVGPTGPVGAAGPAGPNGPPGPAGSR           | 2,567 |
|  | GEPGNIGFPGPK                             | 1,202 |
|  | GEPGSAGPQGPPGPSGEEGK                     | 1,824 |
|  | GEPGVVGAVGTAGPSGPSGLPGER                 | 2,121 |
|  | GEQGPFGPPGFQGLPGPSGPAGEVGKPGER           | 2,858 |
|  | GETGPSGPVGPAGAVGPR                       | 1,563 |
|  | GEVGLPGLSGPVGPPGNPGANGLTGAK              | 2,418 |
|  | GEVGPAGPNGFAGPAGAAGQPGAK                 | 2,051 |
|  | GHNGLQGLPGIAGHHGDQGAPGSVGPAGPR           | 2,800 |
|  | GLHGFEGLPGPAGPR                          | 1,494 |
|  | GLPGSPGNIGPAGK                           | 1,254 |
|  | GLPGVAGAVGEPGPLGIAGPPGAR                 | 2,115 |
|  | GPAGPSGPAGK                              | 895   |
|  | GPKGENGVVGPTGPVGAAGPAGPNGPPGPAG<br>SR    | 2,865 |
|  | GPPGAVGSPGVNGAPGEAGR                     | 1,752 |
|  | GPPGESGAAGPTGPIGSR                       | 1,581 |
|  | GPSGEAGTAGPPGTPGPQGLLGAPGILGLPGSR        | 2,957 |
|  | GPSGPPGPDGNKGEPGVVGAVGTAGPSGPSGL<br>PGER | 3,214 |
|  | GSDGSVGPVGPAGPIGSAGPPGFPGAPGPK           | 2,573 |
|  | GVVGPQGAR                                | 840   |

|                                    |        |                               |       |
|------------------------------------|--------|-------------------------------|-------|
|                                    |        | TGEVGAVGPPGFAGEK              | 1,489 |
|                                    |        | TGHPGTVGPAGIR                 | 1,236 |
|                                    |        | VGAPGPAGAR                    | 868   |
| Plasma<br>protease C1<br>inhibitor | 8.40%  | GVTSVSQIFHSPDLAIR             | 1,827 |
|                                    |        | LEDMEQALSPSVFK                | 1,594 |
|                                    |        | TNLESILSYPK                   | 1,265 |
| Actin,<br>cytoplasmic 1            | 50.10% | DLTDYLMK                      | 1,014 |
|                                    |        | DLYANTVLSGGTTMYPGIADR         | 2,215 |
|                                    |        | DSYVGDEAQSK                   | 1,199 |
|                                    |        | EITALAPSTMK                   | 1,162 |
|                                    |        | MTQIMFETFNTPAMYVAIQAVLSLYASGR | 3,254 |
|                                    |        | QEYDESGPSIVHR                 | 1,517 |
|                                    |        | SYELPDGQVITIGNER              | 1,791 |
|                                    |        | TTGIVMDSGDGVTHTVPIYEGY        | 2,312 |
|                                    |        | TVLSGGTTMYPGIADR              | 1,639 |
|                                    |        | VAPEEHPVLLTEAPLNPK            | 1,954 |
|                                    |        | YPIEHGIVTNWDDMEK              | 1,963 |
|                                    |        | YSVWIGGSILASLSTFQQMWISK       | 2,602 |
| Filamin-A                          | 2.12%  | DAGYGGLSLSIEGPSK              | 1,551 |
|                                    |        | FNEEHIPDSPFVVPVASPSGDAR       | 2,467 |

|                                |        |                                        |       |
|--------------------------------|--------|----------------------------------------|-------|
|                                |        | VTAQGPGLPSGNIANK                       | 1,653 |
| Vimentin                       | 35.00% | DGQVINETSQHDDLE                        | 1,837 |
|                                |        | DNLAEDIMR                              | 1,077 |
|                                |        | EMEENFAVEAANYQDTIGR                    | 2,187 |
|                                |        | EYQDLLNVK                              | 1,122 |
|                                |        | ILLAELEQLK                             | 1,170 |
|                                |        | LHEEEIQELQAQIQEQH                      | 2,102 |
|                                |        | LHEEEIQELQAQIQEQHVQIDVDVSKPDLTAAL<br>R | 3,923 |
|                                |        | LLQDSVDFSLADAINTEFK                    | 2,126 |
|                                |        | LQDEIQNMK                              | 1,119 |
|                                |        | LQEEMLQR                               | 1,047 |
|                                |        | MALDIEIATYR                            | 1,296 |
|                                |        | NLQEAEEWYK                             | 1,310 |
|                                |        | VELQELNDR                              | 1,116 |
| Collagen alpha-<br>2(VI) chain | 10.80% | DVTVTAIGIGDMFHEK                       | 1,733 |
|                                |        | DYDSLAPGFFDR                           | 1,531 |
|                                |        | IDSLSSFK                               | 896   |
|                                |        | NDYATMLPDSSTEIDQDTINR                  | 2,312 |
|                                |        | NLEWIAGGTWTPSALK                       | 1,744 |
|                                |        | QNVVPTVLALGSDVMDVLTTLGDR               | 2,828 |
|                                |        | VFAVVITDGR                             | 1,077 |



|                             |        |                                  |       |
|-----------------------------|--------|----------------------------------|-------|
| Myosin light polypeptide 6  | 22.50% | ALGQNPTNAEVLK                    | 1,355 |
|                             |        | EGNGTVMGAEIR                     | 1,234 |
|                             |        | HVLVTLGEK                        | 996   |
| Complement C3               | 10.30% | ENEGFTVTAEGK                     | 1,282 |
|                             |        | EVVADSVWVDVK                     | 1,346 |
|                             |        | FVTVQATFGTQVVEK                  | 1,654 |
|                             |        | GLEVTITAR                        | 960   |
|                             |        | ILLQGTPVAQMTEDA VDAER            | 2,157 |
|                             |        | LESEETMVLEAHDAQGDVPVTVTVHDFPGK   | 3,251 |
|                             |        | SGSDEVQVGQQR                     | 1,290 |
|                             |        | TGLQEVEVK                        | 1,003 |
|                             |        | TVMVNIENPEGIPVK                  | 1,640 |
|                             |        | VHQYFNVELIQPGAVK                 | 1,842 |
|                             |        | VPVAVQGEDTVQSLTQGDGVAK           | 2,198 |
| Collagen alpha-1(III) chain | 32.70% | DGNPGSDGLPGR                     | 1,174 |
|                             |        | DGPPGPAGNTGAPGSPGVSGPK           | 1,922 |
|                             |        | DGSPGEPGANGLPGAAGER              | 1,757 |
|                             |        | GAAGPPGPPGAAGTPGLQGMPGER         | 2,148 |
|                             |        | GDKGEPGGPGADGVPGK                | 1,511 |
|                             |        | GDTGPPGPQGLQGLPGTGGPPGENGKPGEPGP | 3,068 |

|                           |       |                                   |       |
|---------------------------|-------|-----------------------------------|-------|
|                           |       | K                                 |       |
|                           |       | GEAGIPGVPGAK                      | 1,085 |
|                           |       | GEGGAPGLPGIAGPR                   | 1,338 |
|                           |       | GEGGPPGVAGPPGGSGPAGPPGPQGK        | 2,283 |
|                           |       | GEMGPAGIPGAPGLMGAR                | 1,671 |
|                           |       | GENGLPGENGAPGPMGPR                | 1,739 |
|                           |       | GESGKPGANGLSGER                   | 1,432 |
|                           |       | GESGPAGPAGAPGPAGSR                | 1,509 |
|                           |       | GETGPPGPAGFPGAPQNGEPGGK           | 2,181 |
|                           |       | GEVGPAGSPGSNGAPGQR                | 1,627 |
|                           |       | GFPGNPGAPGSPGPAGQQGAIGSPGPAGPR    | 2,690 |
|                           |       | GGPGGPGPQGP                       | 1,208 |
|                           |       | GLAGPPGMPGPR                      | 1,139 |
|                           |       | GPPGLAGAPGLR                      | 1,095 |
|                           |       | GPPGPQGLPGLAGTAGEPGR              | 1,818 |
|                           |       | GPTGPIGPPGPAGQPGDKGEGGAPGLPGIAGPR | 2,950 |
|                           |       | GPVGPSGPPGK                       | 966   |
|                           |       | GQPGVMGFPGPK                      | 1,220 |
|                           |       | GSPGAQGGPPGAPGLGIAGITGAR          | 2,104 |
|                           |       | GSPGGPGAAGFPGAR                   | 1,304 |
|                           |       | NETGPGQGGPPTGPGGDK                | 1,720 |
| Fibrinogen<br>alpha chain | 5.08% | ADSGEGDFLAEGGGVR                  | 1,537 |

|                             |        |                           |       |
|-----------------------------|--------|---------------------------|-------|
|                             |        | HPDEAAFFDTASTGK           | 1,594 |
|                             |        | MKPVPDLVPGNFK             | 1,442 |
| Elongation factor 1-alpha 1 | 13.40% | IGGIGTVPVGR               | 1,026 |
|                             |        | THINIVVIGHVDSGK           | 1,589 |
|                             |        | VETGVLKPGMVVTFAPVNVTTTEVK | 2,515 |
|                             |        | YYVTIIDAPGHR              | 1,405 |
| Prelamin-A/C                | 12.30% | AGQVVTIWAAGAGATHSPPTDLVWK | 2,533 |
|                             |        | DLEDSLAR                  | 918   |
|                             |        | EAALSTALSEK               | 1,120 |
|                             |        | LADALQELR                 | 1,029 |
|                             |        | NSNLVGAAHEELQQR           | 1,753 |
|                             |        | SNEDQSMGNWQIK             | 1,537 |
| Alpha-2-macroglobulin       | 7.19%  | FEVQVTVPK                 | 1,047 |
|                             |        | LHTEAQIQEEGTVELTGR        | 2,110 |
|                             |        | LPPNVVEESAR               | 1,211 |
|                             |        | LTAQPAPTSIDLTSATNIVK      | 2,057 |
|                             |        | NEDSLVVFVQTDK             | 1,395 |
|                             |        | VGFYESDVMGR               | 1,260 |
|                             |        | VVSMDENFHPLNELIPLVYIQDPK  | 2,810 |
| Serum albumin               | 28.10% | AVMDDFAAFVEK              | 1,343 |
|                             |        | DDNPNLPR                  | 940   |

|                                |        |                   |       |
|--------------------------------|--------|-------------------|-------|
|                                |        | DLGEENFK          | 951   |
|                                |        | DVFLGMFLYEYAR     | 1,624 |
|                                |        | EFNAETTFH         | 1,243 |
|                                |        | FEQLGEYK          | 1,013 |
|                                |        | FQNALLVR          | 961   |
|                                |        | FYAPPELLFAK       | 1,346 |
|                                |        | HPDYSVLLLR        | 1,312 |
|                                |        | HPYFYAPPELLFAK    | 1,743 |
|                                |        | KVPQVSTPTLVEVSR   | 1,640 |
|                                |        | LVAASQAALGL       | 1,014 |
|                                |        | LVNEVTEFAK        | 1,150 |
|                                |        | QTALVELVK         | 1,001 |
|                                |        | RHPDYSVLLLR       | 1,468 |
|                                |        | SLHTLFGDK         | 1,018 |
|                                |        | VFDEFKPLVEEPQNLIK | 2,045 |
|                                |        | VPQVSTPTLVEVSR    | 1,512 |
|                                |        | YLYEIAR           | 927   |
| Alpha-1-acid<br>glycoprotein 1 | 21.90% | NWGLSVYADKPETTK   | 1,709 |
|                                |        | SDVVYTDWK         | 1,113 |
|                                |        | TEDTIFLR          | 995   |
|                                |        | TYMLAFDVNDEK      | 1,446 |
| Lumican                        | 21.30% | EYLDLSFNQIAR      | 1,469 |

|                            |        |                       |       |
|----------------------------|--------|-----------------------|-------|
|                            |        | FNALQYLR              | 1,025 |
|                            |        | ISNIPDEYFK            | 1,226 |
|                            |        | LKEDAVSAAFK           | 1,179 |
|                            |        | NIPTVNENLENYYLEVNQLEK | 2,536 |
|                            |        | NNQIDHIDEK            | 1,226 |
| Hemoglobin<br>subunit beta | 25.90% | SAVTALWGK             | 933   |
|                            |        | SDGLAHLNLK            | 1,183 |
|                            |        | VLGAFSDGLAHLNLK       | 1,670 |
|                            |        | VNVDEVGGEALGR         | 1,315 |

1 These data were generated from a single patient.

**Supplemental Table 3:** Identified proteins from hydrogel mediated on tissue digestion, wound bed region.<sup>1</sup>

| Protein name                            | Accession numbers | Molecular weight (Da) | Number of unique peptides <sup>2</sup> | Number of unique spectra <sup>3</sup> | Number of total spectra <sup>4</sup> |
|-----------------------------------------|-------------------|-----------------------|----------------------------------------|---------------------------------------|--------------------------------------|
| <b>14-3-3 protein zeta/delta</b>        | P63104            | 28,037                | 4                                      | 4                                     | 4                                    |
| <b>78 kDa glucose-regulated protein</b> | P11021            | 72,335                | 5                                      | 5                                     | 5                                    |
| Actin, aortic smooth muscle             | P62736            | 42,010                | 4                                      | 5                                     | 5                                    |
| Actin, cytoplasmic 1                    | P60709            | 41,794                | 13                                     | 16                                    | 23                                   |
| Alpha-1-acid glycoprotein 1             | P02763            | 23,512                | 5                                      | 5                                     | 5                                    |
| Alpha-1-antichymotrypsin                | P01011            | 47,653                | 4                                      | 4                                     | 4                                    |
| Alpha-1-antitrypsin                     | P01009            | 46,738                | 6                                      | 8                                     | 10                                   |
| Alpha-2-macroglobulin                   | P01023            | 163,290               | 6                                      | 6                                     | 7                                    |
| <b>Alpha-actinin-1</b>                  | P12814            | 103,061               | 3                                      | 3                                     | 3                                    |
| <b>Alpha-enolase</b>                    | P06733            | 47,170                | 3                                      | 3                                     | 3                                    |
| Annexin A1                              | P04083            | 38,716                | 3                                      | 3                                     | 3                                    |
| Annexin A2                              | P07355            | 38,606                | 5                                      | 5                                     | 6                                    |
| Annexin A6                              | P08133            | 75,878                | 3                                      | 3                                     | 3                                    |

|                                    |        |         |    |    |    |
|------------------------------------|--------|---------|----|----|----|
| <b>Caldesmon</b>                   | Q05682 | 62,712  | 3  | 3  | 3  |
| <b>Ceruloplasmin</b>               | P00450 | 108,823 | 3  | 3  | 3  |
| Collagen alpha-1(I) chain          | P02452 | 138,941 | 29 | 34 | 41 |
| Collagen alpha-1(III) chain        | P02461 | 138,565 | 22 | 23 | 33 |
| Collagen alpha-1(VI) chain         | P12109 | 108,531 | 3  | 4  | 4  |
| <b>Collagen alpha-1(XII) chain</b> | Q99715 | 333,201 | 4  | 4  | 4  |
| Collagen alpha-2(I) chain          | P08123 | 129,315 | 24 | 25 | 30 |
| Collagen alpha-2(VI) chain         | P12110 | 108,581 | 3  | 4  | 4  |
| Collagen alpha-3(VI) chain         | P12111 | 343,667 | 18 | 21 | 22 |
| Complement C3                      | P01024 | 187,149 | 12 | 14 | 15 |
| <b>Endoplasmin</b>                 | P14625 | 92,472  | 3  | 3  | 3  |
| Fibrinogen alpha chain             | P02671 | 94,973  | 12 | 13 | 14 |
| Fibrinogen beta chain              | P02675 | 55,929  | 12 | 14 | 14 |
| Fibrinogen gamma chain             | P02679 | 51,513  | 11 | 13 | 15 |
| Fibronectin                        | P02751 | 243,228 | 8  | 9  | 10 |
| <b>Fibulin 1</b>                   | B1AHL2 | 78,327  | 3  | 3  | 3  |
| Filamin-A                          | P21333 | 280,729 | 4  | 4  | 4  |

|                                                      |        |         |    |    |    |
|------------------------------------------------------|--------|---------|----|----|----|
| Heat shock protein HSP 90-alpha                      | P07900 | 84,663  | 4  | 4  | 4  |
| Hemoglobin subunit alpha                             | P69905 | 15,258  | 3  | 4  | 6  |
| Hemoglobin subunit beta                              | P68871 | 15,998  | 5  | 5  | 5  |
| Histone H1.4                                         | P10412 | 21,867  | 3  | 3  | 3  |
| <b>Ig kappa chain C region</b>                       | P01834 | 11,609  | 3  | 4  | 8  |
| Myosin-9                                             | P35579 | 226,538 | 17 | 18 | 18 |
| <b>Myristoylated alanine-rich C-kinase substrate</b> | P29966 | 31,554  | 3  | 3  | 3  |
| Neuroblast differentiation-associated protein AHNAK  | Q09666 | 629,104 | 3  | 3  | 3  |
| <b>Peptidyl-prolyl cis-trans isomerase B</b>         | P23284 | 23,743  | 4  | 4  | 4  |
| Prelamin-A/C                                         | P02545 | 74,141  | 3  | 3  | 3  |
| <b>Prothymosin alpha</b>                             | P06454 | 12,203  | 3  | 3  | 3  |
| Pyruvate kinase isozymes M1/M2                       | P14618 | 57,938  | 7  | 7  | 7  |
| Serotransferrin                                      | P02787 | 77,064  | 3  | 3  | 3  |
| <b>Serpin H1</b>                                     | P50454 | 46,442  | 4  | 5  | 5  |
| Serum albumin                                        | P02768 | 69,367  | 16 | 18 | 21 |



|                                  |        |         |    |    |    |
|----------------------------------|--------|---------|----|----|----|
| <b>Tenascin</b>                  | P24821 | 240,850 | 3  | 3  | 3  |
| <b>Transketolase</b>             | P29401 | 68,816  | 3  | 3  | 3  |
| <b>Triosephosphate isomerase</b> | P60174 | 30,791  | 3  | 3  | 3  |
| Tubulin alpha-1B chain           | P68363 | 46,298  | 6  | 6  | 6  |
| <b>Tubulin beta chain</b>        | P07437 | 49,671  | 4  | 5  | 5  |
| Vimentin                         | P08670 | 53,653  | 18 | 18 | 21 |

<sup>1</sup> These data were generated from a single patient. Proteins listed were represented by  $\geq 3$  unique peptides. The number of unique spectra and the number of total spectra recorded per protein are also listed. Protein names marked in bold and highlighted in blue were uniquely detected within the wound bed region.

<sup>2</sup>The designation “number of unique peptides” corresponds to the number of distinct amino acid sequences represented in the peptides that match to a protein.

<sup>3</sup>The designation “number of unique spectra” means that two spectra are unique if they match different peptides or match two different charge states of the same peptide or match both a peptide and a modified form of the peptide.

<sup>4</sup>The designation “number of total spectra” represents the total number of spectra which is assigned to the protein in question.

**Supplemental Table 4:** identified proteins from hydrogel mediated on tissue digestion, adjacent dermis region.<sup>1</sup>

| Protein name                                     | Accession numbers | Molecular weight (Da) | Number of unique peptides <sup>2</sup> | Number of unique spectra <sup>3</sup> | Number of total spectra <sup>4</sup> |
|--------------------------------------------------|-------------------|-----------------------|----------------------------------------|---------------------------------------|--------------------------------------|
| Actin, aortic smooth muscle                      | P62736            | 42,010                | 4                                      | 4                                     | 4                                    |
| Actin, cytoplasmic 1                             | P60709            | 41,794                | 12                                     | 16                                    | 19                                   |
| Alpha-1-acid glycoprotein 1                      | P02763            | 23,512                | 4                                      | 4                                     | 5                                    |
| Alpha-1-antichymotrypsin                         | P01011            | 47,653                | 3                                      | 3                                     | 3                                    |
| Alpha-1-antitrypsin                              | P01009            | 46,738                | 7                                      | 9                                     | 10                                   |
| Alpha-2-macroglobulin                            | P01023            | 163,290               | 7                                      | 7                                     | 8                                    |
| Annexin A1                                       | P04083            | 38,716                | 3                                      | 3                                     | 3                                    |
| Annexin A2                                       | P07355            | 38,606                | 3                                      | 4                                     | 4                                    |
| <b>Apolipoprotein A-I</b>                        | P02647            | 27,910                | 3                                      | 3                                     | 3                                    |
| <b>ATP synthase subunit alpha, mitochondrial</b> | P25705            | 59,752                | 3                                      | 3                                     | 3                                    |
| <b>Cofilin-1</b>                                 | P23528            | 18,503                | 3                                      | 3                                     | 3                                    |
| Collagen alpha-1(I) chain                        | P02452            | 138,941               | 35                                     | 44                                    | 120                                  |

|                                    |        |         |    |    |    |
|------------------------------------|--------|---------|----|----|----|
| Collagen alpha-1(III) chain        | P02461 | 138,565 | 26 | 34 | 69 |
| Collagen alpha-1(VI) chain         | P12109 | 108,531 | 10 | 13 | 14 |
| <b>Collagen alpha-1(XIV) chain</b> | Q05707 | 193,516 | 3  | 3  | 3  |
| Collagen alpha-2(I) chain          | P08123 | 129,315 | 29 | 35 | 52 |
| Collagen alpha-2(VI) chain         | P12110 | 108,581 | 7  | 7  | 7  |
| Collagen alpha-3(VI) chain         | P12111 | 343,667 | 26 | 31 | 34 |
| Complement C3                      | P01024 | 187,149 | 11 | 11 | 11 |
| <b>Decorin</b>                     | P07585 | 39,748  | 4  | 4  | 5  |
| <b>Elongation factor 1-alpha 1</b> | P68104 | 50,141  | 4  | 4  | 4  |
| Fibrinogen alpha chain             | P02671 | 94,973  | 3  | 5  | 5  |
| Fibrinogen beta chain              | P02675 | 55,929  | 7  | 7  | 7  |
| Fibrinogen gamma chain             | P02679 | 50,324  | 4  | 6  | 6  |
| Fibronectin                        | P02751 | 243,228 | 3  | 3  | 3  |
| Filamin-A                          | P21333 | 280,729 | 3  | 3  | 3  |
| <b>Gelsolin</b>                    | P06396 | 85,698  | 3  | 3  | 3  |
| <b>Haptoglobin</b>                 | P00738 | 45,205  | 3  | 3  | 12 |
| Heat shock protein HSP 90-alpha    | P07900 | 84,663  | 3  | 3  | 3  |

|                                                     |        |         |    |    |    |
|-----------------------------------------------------|--------|---------|----|----|----|
| Hemoglobin subunit alpha                            | P69905 | 15,258  | 3  | 4  | 6  |
| Hemoglobin subunit beta                             | P68871 | 15,998  | 4  | 6  | 7  |
| Histone H1.4                                        | P10412 | 21,867  | 3  | 3  | 3  |
| <b>Ig gamma-1 chain C region</b>                    | P01857 | 36,105  | 3  | 5  | 6  |
| <b>Ig lambda-2 chain C regions</b>                  | P0CG05 | 11,293  | 3  | 3  | 4  |
| <b>Lumican</b>                                      | P51884 | 38,432  | 6  | 6  | 6  |
| <b>Mimecan</b>                                      | P20774 | 33,925  | 4  | 5  | 5  |
| <b>Myosin light polypeptide 6</b>                   | P60660 | 17,089  | 3  | 3  | 3  |
| Myosin-9                                            | P35579 | 226,538 | 9  | 9  | 9  |
| Neuroblast differentiation-associated protein AHNAK | Q09666 | 629,104 | 10 | 10 | 10 |
| <b>Plasma protease C1 inhibitor</b>                 | P05155 | 59,493  | 3  | 4  | 4  |
| Prelamin-A/C                                        | P02545 | 74,141  | 6  | 6  | 6  |
| Pyruvate kinase isozymes M1/M2                      | P14618 | 57,938  | 6  | 6  | 6  |
| Serotransferrin                                     | P02787 | 77,064  | 5  | 7  | 7  |
| Serum albumin                                       | P02768 | 69,367  | 19 | 28 | 44 |
| Tubulin alpha-1B chain                              | P68363 | 50,152  | 3  | 3  | 3  |

|          |        |        |    |    |    |
|----------|--------|--------|----|----|----|
| Vimentin | P08670 | 53,653 | 13 | 14 | 20 |
|----------|--------|--------|----|----|----|

<sup>1</sup> These data were generated from a single patient.

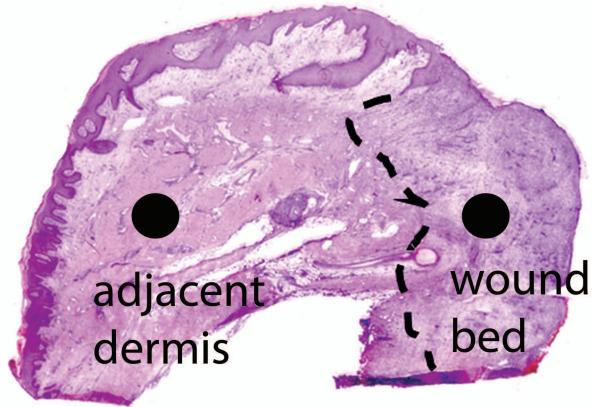

●  
adjacent  
dermis

●  
wound  
bed

1mm —

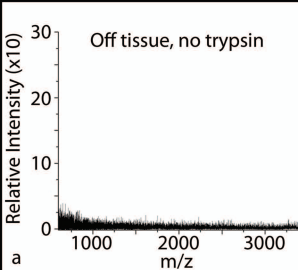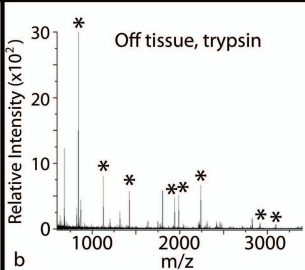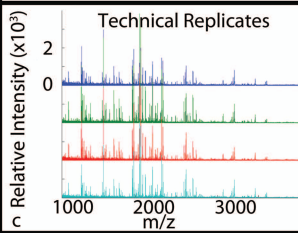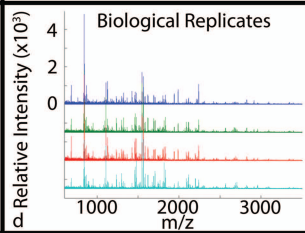

## Supplemental Figure Legends

Supplemental Figure 1: H&E of a chronic ulcer. Dotted line divides the wound bed from the adjacent dermis. Black dots represent locations of hydrogel placement to scale.

Supplemental Figure 2: MALDI MS spectra a) from off tissue hydrogel without trypsin; b) from off tissue hydrogel loaded with trypsin; (\*) signals are related to trypsin autolysis products. Displays show blank experiments to further corroborate the reliability of the hydrogel network method on FFPE tissues; For c and d, the spectra are stacked for easy visualization and comparison between replicates. The values along the y-axis are intended to provide scale only. c) spectra recorded from N=4 FFPE serial sections, from the same patient and submitted to the hydrogel mediated digestion. d) spectra recorded from N=4 FFPE tissues, from 4 different patients displaying a comparable clinical situation and submitted to the hydrogel mediated digestion. The spectra are stacked for easy visualization and comparison between biological replicates.
